# Supplementary material for: A qualitative exploration of young consumer attitudes towards the consumption of ultra processed foods (UPFs)
Source: Research Square preprint supplement (doi:10.21203/rs.3.rs-6448214/v1), 2025-05-07
Supplement: Supplementary file 1 [file 874915b762a8dd835d65d9f9.docx]

Semi structured interview guide

**Consumers attitudes towards the consumption of ultra-processed foods**

**Focus Group structured- interview questions**

What comes to mind when you hear the term ultra-processed foods?

What influences your perception of ultra-processed foods?

What influences your attitudes towards ultra-processed foods?

How often and what types of ultra-processed foods do you typically consume in your diet?

What influences your decision to include ultra-processed foods in your diet?

Do you have any concerns, regarding the consumption of ultra-processed foods?

Do you feel that ultra-processed foods can be included as part of a healthy diet?

Do you feel ultra-processed foods can affect a persons health and well-being?
