# Supplementary material for: A qualitative exploration of young consumer attitudes towards the consumption of ultra processed foods (UPFs)
Source: Research Square preprint supplement (doi:10.21203/rs.3.rs-6448214/v1), 2025-05-07
Supplement: Supplementary file 2 [file f58a576e423a245dadf27b92.docx]

Participant information sheet

‌ **Study Title: Consumers attitudes towards the consumption of ultra-processed foods**

**PARTICIPANT INFORMATION SHEET**

Research Ethics Reference:

Version 1.0 Date: 18/07/2024

We would like to invite you to take part in a research study. Before you decide, it is important for you to understand why the research is being undertaken and what it will involve. Please take time to read the information about the study carefully and discuss it with others if you wish. Ask us anything that is not clear.

**What is the purpose of the research?**

This research explores younger consumers' attitudes towards ultra-processed foods (UPFs) in our diet using qualitative data gathered through focus group interviews. The study aims to understand consumers' knowledge and perceptions of UPFs, identify factors influencing their attitudes and dietary behaviours, and assess the impact of health awareness on UPF consumption. Focus groups comprising of university students will discuss their motivations for UPF consumption, the perceived benefits and risks, and look at their suggestions for reducing intake. Given the emerging evidence linking ultra-processed foods to poorer health outcomes, understanding individuals' behaviour is important for informing targeted interventions, public health policies, and marketing strategies aimed at promoting healthier food choices.

**Why have I been invited to take part?**

You have been invited to take part in this research because you are aged between 18 and 25 years and NOT studying a food or nutrition-related degree.

We are hoping to recruit up to 20 people to the study.

**Do I have to take part?**

It is up to you to decide if you want to take part in this research. If you agree to participate, we will ask you to sign a consent form and will give you a copy to keep. However, you would still be free to withdraw from the study at any time, without giving a reason, simply let the research team know. As a student at the University of Nottingham, there would be no disadvantages to your study or to you personally if you decide not to take part in this study, or if you decide to withdraw at any point.

1. ***What will happen to me if I take part?***

A researcher will contact you to go over the information sheet, explain the procedures, and check that you meet the inclusion criteria. If you agree to take part in the study, you will be asked to attend a single focus group that will be arranged on campus outside of lecture hours. We are hoping to run up to four focus groups at different times and different days of the week so that you can attend a focus group that is at a time that will most suit you.

Upon arrival for the focus group, visit, we will talk you through the study procedures and give you chance to ask any questions. There will be approximately six people in the focus group – all students of a similar age. We will try and provide some refreshments.

The focus group will last for approximately one hour and will feel like a discussion about everyone’s thoughts about UPFs. The researcher will have some questions to help facilitate the discussion and to ensure that the research objectives are met.

1. ***W*hat are Ultra-Processed Foods (UPFs)**

At present in the UK there is no agreed definition for UPF and they are not referred to in government dietary recommendations. People tend to use the NOVA definition but this is a broad. Generally UPFs are foods that have been heavily processed (do not look much like the original food) and can have a poor nutritional profile, are energy dense and high in fat, sugars and salt. But the researchers recognise that this definition does not apply to all UPFs. The British Nutrition Foundation have a very good position statement available. [the-concept-of-ultra-processed-food-background-information-24-04-23-branded.pdf (nutrition.org.uk)](https://www.nutrition.org.uk/media/40xnekuy/the-concept-of-ultra-processed-food-background-information-24-04-23-branded.pdf)

1. **Are there any risks in taking part?**

There are few risks involved in focus group research. However, one possible risk is of participants disclosing personal information or what has been said in the focus group once the study is over.

In order to reduce any potential risks, the researchers will remind participants to respect each other’s privacy and not repeat anything that has been discussed both in the focus group and verbally before the start of the study.

It is unlikely that participants will find the topic sensitive or upsetting. It is likely that participants will have different opinions and we appreciate that many factors can influence a person’s choice of foods. No judgements will be made and the researchers will ask participants not to make judgements either.

1. ***Are there any benefits in taking part?***

There will be no direct benefit to you from taking part in this research but your contribution may help us better understand younger peoples thoughts about UPFs in the diet.

1. ***Will my time/travel costs be reimbursed?***

Participants will receive an inconvenience allowance to participate in the study in the form of a £10 amazon voucher.

1. ***What happens to the data provided?***

The focus group discussions will be recorded. Immediately afterwards the audio-recordings will be transferred to Office 365 (One Drive) where the recordings will be stored securely. Once transcribed the original interviews will be deleted.

To help ensure your privacy, you will be assigned a volunteer study identification number (for example P01 for participant number 1), and it will be used instead of your name. We will save all recordings and research data using that volunteer study identification number so that none of the data will have your real name or other individual identifiers associated with them. Your name and any information about you will not be disclosed outside the study centre. If applicable: We would like your permission to use fully anonymised direct quotes in research publications

**Personal data** (consent forms) will be stored confidentially using Office 365 and only be available to the lead supervisor.

All research data and records will be stored for a minimum of 7 years after publication or public release of the work of the research.

We would like your permission to use anonymised data in future studies, and to share our research data (e.g. in online databases) with other researchers in other Universities and organisations both inside and outside the European Union. This would be used for research in health and social care. Sharing research data is important to allow peer scrutiny, re-use (and therefore avoiding duplication of research) and to understand the bigger picture in particular areas of research. All personal information that could identify you will be removed or changed before information is shared with other researchers or results are made public.

Data sharing in this way is usually anonymised (so that you could not be identified)

1. ***What will happen if I don’t want to carry on with the study?***

Even after you have signed the consent form, you are free to withdraw from the study without giving any reason. Any personal data will be destroyed.

If you take part in the focus group and then decide that you wish to withdraw, you will need to do so before the data is fully anonymised for analysis as it would otherwise be difficult for us to separate out your data.

If you withdraw we will no longer collect any information about you or from you but we will keep the anonymous research data that has already been collected and stored as we are not allowed to tamper with study records. This information may have already been used in some analyses and may still be used in the final study analyses.

1. **Who will know that I am taking part in this research?**

Data will be used for research purposes only and in accordance with the General Data Protection Regulations. Any imaging/audio digital recordings and electronic data will be anonymised with a code as detailed above. Electronic storage devices will be encrypted while transferring and saving of all sensitive data generated in the course of the research. All such data are kept on password-protected databases sitting on a restricted access computer system and any paper information (such as your consent form and contact details) would be stored safely in lockable cabinets in a swipe-card secured building and would only be accessed by the research team.

Under UK Data Protection laws the University is the Data Controller (legally responsible for the data security) and the Chief Investigator of this study (named below) is the Data Custodian (manages access to the data).

You can find out more about how we use your personal information and to read our privacy notice at:

<https://www.nottingham.ac.uk/utilities/privacy.aspx/>

Designated individuals of the University of Nottingham may be given access to data for monitoring and/or audit of the study to ensure we are complying with guidelines.

With your consent, we will keep your personal information on a secure database to contact you for future studies.

Anything you say during an interview/focus group will be kept confidential, unless you reveal something of concern that may put yourself or anyone else at risk. It will then be necessary to report to the appropriate persons. Due to the professional responsibilities of some University staff, if you mention something during the focus group which may require reporting the research team will discuss it with you and decide on a course of action.

1. **What will happen to the results of the research?**

The research will be written up as dissertation for the degree of MNutr Nutrition & Dietetics and be submitted for publication in a peer-reviewed scientific journal at a later date.

1. **Who has reviewed this study?**

All research involving people is looked at by an independent group of people, called a Research Ethics Committee, to protect your interests.

1. **Who is organising and funding the research?**

This research is being organised by the project supervisor, Dr Amanda Avery, at the University of Nottingham. The research is not being funded by any external organisation.

1. **What if there is a problem?**

If you have a concern about any aspect of this project, please speak to the researcher Lydia Shannon or the Principal Investigator Dr Amanda Avery, who will do their best to answer your query. The researcher will acknowledge your concern and give you an indication of how she intends to deal with it. If you remain unhappy and wish to complain formally, you can do this by contacting the School of Biosciences Research & Ethics committee, [sb-biosciences-ethics@nottingham.ac.uk](mailto:sb-biosciences-ethics@nottingham.ac.uk)

1. Contact Details

If you would like to discuss the research with someone beforehand (or if you have questions afterwards), please contact:

Dr Amanda Avery

Division of Food, Nutrition & Dietetics

School of Bioscience

[Amanda.avery@nottingham.ac.uk](mailto:Amanda.avery@nottingham.ac.uk)
